# Supplementary material for: Origin of ultraweak fluorescence of 8-hydroxyquinoline in water: photoinduced ultrafast proton transfer
Source: Royal Society of Chemistry journal article supplement (doi:10.1039/c5ra23802a), 2016-01-01
Supplement: c5ra23802a1.pdf [file c5ra23802a1.pdf]

Supporting Information for

**Origin of ultraweak fluorescence of 8-hydroxyquinoline in water:  
photoinduced ultrafast proton transfer**

Sun-Young Park,<sup>a</sup> Prasun Ghosh,<sup>b</sup> Sung O. Park,<sup>c</sup> Young Min Lee,<sup>b</sup> Sang Kyu Kwak\*<sup>c</sup> and Oh-Hoon Kwon\*<sup>ab</sup>

*<sup>a</sup>Center for Soft and Living Matter, Institute for Basic Science (IBS), Ulsan 689-798, Republic of Korea*

*<sup>b</sup>Department of Chemistry, School of Molecular Sciences, Ulsan National Institute of Science and Technology (UNIST), Ulsan 689-798, Republic of Korea*

*<sup>c</sup>School of Energy and Chemical Engineering, Ulsan National Institute of Science and Technology (UNIST), Ulsan 689-798, Republic of Korea*

\*To whom correspondence should be addressed. E-mail: ohkwon@unist.ac.kr;  
skkwak@unist.ac.kr.

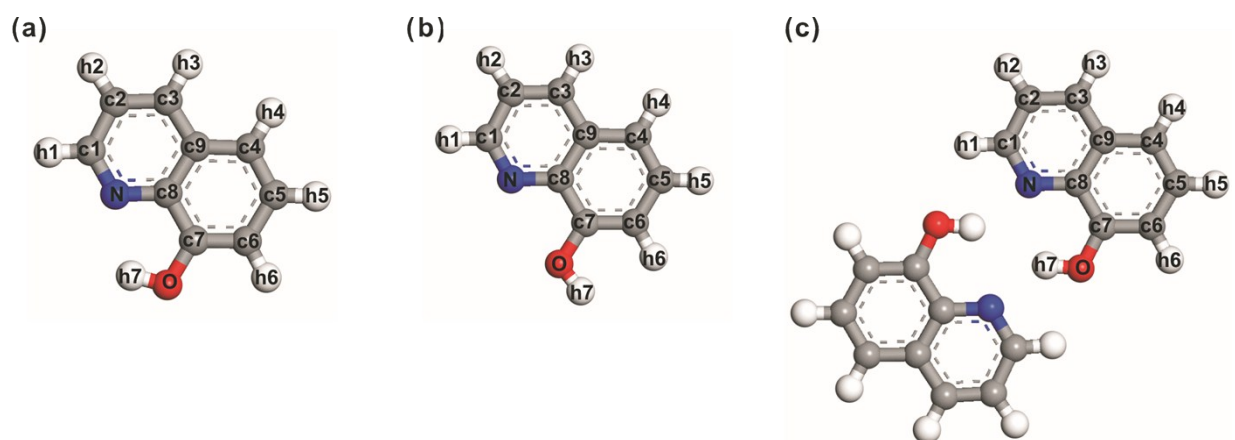

|    | <i>Cis-</i> | <i>Trans-</i> | Dimer  |    | <i>Cis-</i> | <i>Trans-</i> | Dimer  |
|----|-------------|---------------|--------|----|-------------|---------------|--------|
| N  | -0.661      | -0.696        | -0.320 | c1 | 0.280       | 0.297         | 0.089  |
| O  | -0.508      | -0.614        | -0.476 | c2 | -0.355      | -0.399        | -0.215 |
| h7 | 0.392       | 0.490         | 0.244  | c3 | -0.014      | 0.024         | -0.178 |
| h1 | 0.098       | 0.090         | 0.117  | c4 | -0.272      | -0.304        | -0.410 |
| h2 | 0.196       | 0.204         | 0.183  | c5 | -0.189      | -0.111        | -0.060 |
| h3 | 0.156       | 0.152         | 0.185  | c6 | -0.215      | -0.319        | -0.345 |
| h4 | 0.191       | 0.199         | 0.209  | c7 | 0.081       | 0.113         | 0.264  |
| h5 | 0.186       | 0.174         | 0.166  | c8 | 0.520       | 0.648         | 0.154  |
| h6 | 0.198       | 0.206         | 0.210  | c9 | -0.084      | -0.156        | 0.182  |

**Fig. S1.** Charge distribution of *cis*- (a) and *trans*- (b) optimized 8HQ monomer and 8HQ dimer (c).

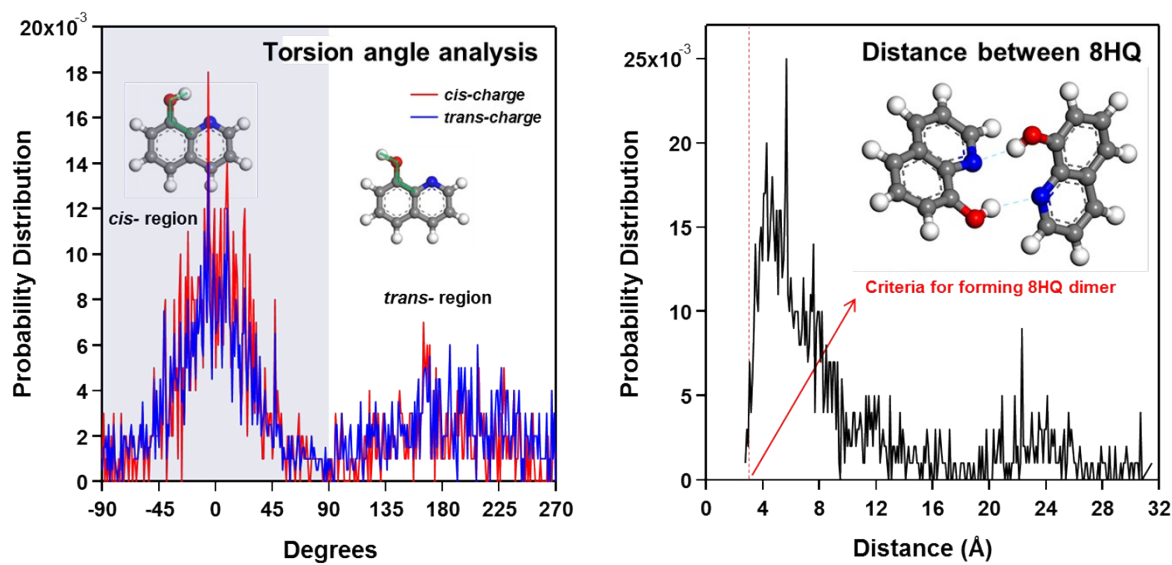

**Fig. S2.** Probability distribution of torsional angle analysis of 8HQ monomer starting with *cis*-charges (red) and *trans*-charges (blue) calculated from DFT (a) and distance between 8HQs (b).
